# Supplementary material for: Identification of Variants (rs11571707, rs144848, and rs11571769) in the BRCA2 Gene Associated with Hereditary Breast Cancer in Indigenous Populations of the Brazilian Amazon
Source: PubMed Central journal article supplement (PMC7911168; doi:10.3390/genes12020142), 2021-01-22
Supplement: genes-12-00142-s001.pdf [file genes-12-00142-s001.pdf]

**Table S1.** Description of all variants in the *BRCA1* and *BRCA2* genes found in the Amerindian individuals (IND).

| Gene         | SNP ID     | Region             | Change in nucleotide | Impact predicted by SNPeff | Minor Allele Frequencies |        |        |        |        |        |
|--------------|------------|--------------------|----------------------|----------------------------|--------------------------|--------|--------|--------|--------|--------|
|              |            |                    |                      |                            | IND                      | AFR    | AMR    | EAS    | EUR    | SAS    |
| <i>BRCA1</i> | rs8176318  | 3UTR               | C > A                | Modifier                   | 0.2916                   | 0.2263 | 0.3804 | 0.4478 | 0.3655 | 0.4821 |
| <i>BRCA1</i> | rs799923   | Intronic           | G > A                | Modifier                   | 0.0156                   | 0.0389 | 0.0845 | 0.0007 | 0.2299 | 0.1797 |
| <i>BRCA1</i> | rs16941    | CDS                | T > C                | Moderate                   | 0.4531                   | 0.1797 | 0.3083 | 0.3777 | 0.3254 | 0.4996 |
| <i>BRCA1</i> | rs16942    | CDS                | T > C                | Moderate                   | 0.4531                   | 0.2358 | 0.3141 | 0.3827 | 0.3259 | 0.4999 |
| <i>BRCA1</i> | rs2070833  | Intronic           | G > T                | Modifier                   | 0.0151                   | -      | -      | -      | -      | -      |
| <i>BRCA1</i> | rs1799966  | Other <sup>a</sup> | T > C                | Moderate                   | 0.4531                   | 0.2397 | 0.3138 | 0.3805 | 0.3268 | 0.5001 |
| <i>BRCA1</i> | rs12516    | 3UTR               | G > A                | Modifier                   | 0.24                     | 0.3012 | 0.3433 | 0.4286 | 0.3841 | 0.4839 |
| <i>BRCA1</i> | rs1060915  | CDS                | A > G                | Low                        | 0.4531                   | 0.18   | 0.3088 | 0.3777 | 0.3258 | 0.4993 |
| <i>BRCA1</i> | rs799905   | Intronic           | G > C                | Modifier                   | 0.4754                   | 0.7789 | 0.4468 | 0.4403 | 0.3796 | 0.5116 |
| <i>BRCA1</i> | rs1799949  | CDS                | G > A                | Low                        | 0.4531                   | 0.2364 | 0.3138 | 0.3783 | 0.3252 | 0.5002 |
| <i>BRCA1</i> | rs28897689 | CDS                | T > C                | Moderate                   | 0                        | 0.0011 | 0.0012 | -      | 0.0064 | 0.0011 |
| <i>BRCA1</i> | rs16940    | CDS                | A > G                | Low                        | 0.4531                   | 0.1792 | 0.308  | 0.3785 | 0.3239 | 0.4995 |
| <i>BRCA1</i> | rs8176194  | Intronic           | A > C                | Modifier                   | 0                        | -      | -      | -      | -      | -      |
| <i>BRCA1</i> | rs1800062  | CDS                | C > T                | Low                        | 0                        | 0.0002 | 0.0101 | 0.0414 | 0.0001 | 0.0003 |
| <i>BRCA1</i> | rs77939865 | Intronic           | CAA > C              | Modifier                   | 0                        | -      | -      | -      | -      | -      |
| <i>BRCA1</i> | -          | CDS                | T > C                | Moderate                   | 0                        | -      | -      | -      | -      | -      |
| <i>BRCA1</i> | rs8176235  | Intronic           | C > T                | Modifier                   | 0                        | -      | -      | -      | -      | -      |
| <i>BRCA1</i> | rs1799949  | Other <sup>a</sup> | G > A                | Moderate                   | 0.4531                   | 0.2364 | 0.3138 | 0.3783 | 0.3252 | 0.5002 |
| <i>BRCA1</i> | -          | Intronic           | GTT > G              | Modifier                   | 0                        | -      | -      | -      | -      | -      |
| <i>BRCA1</i> | rs799917   | CDS                | G > A                | Moderate                   | 0.4841                   | 0.8193 | 0.3435 | 0.378  | 0.3341 | 0.5285 |
| <i>BRCA2</i> | rs58778056 | Intronic           | C > CT               | Modifier                   | 0                        | -      | -      | -      | -      | -      |
| <i>BRCA2</i> | rs11571769 | CDS                | G > A                | Moderate                   | 0.1111                   | 0.0012 | 0.0349 | -      | 0.0044 | 0.014  |
| <i>BRCA2</i> | rs206076   | CDS                | G > C                | Low                        | 1                        | 0.9253 | 0.9967 | 0.9999 | 0.9995 | 0.9998 |
| <i>BRCA2</i> | rs1799955  | CDS                | A > G                | Low                        | 0.1065                   | 0.2116 | 0.1796 | 0.3847 | 0.2143 | 0.2161 |
| <i>BRCA2</i> | rs543304   | CDS                | T > C                | Low                        | 0.0677                   | 0.205  | 0.1865 | 0.1792 | 0.2084 | 0.1121 |
| <i>BRCA2</i> | rs144848   | CDS                | A > C                | Moderate                   | 0.5078                   | 0.1249 | 0.3049 | 0.2728 | 0.2818 | 0.3558 |
| <i>BRCA2</i> | rs1799943  | 5UTR               | G > A                | Modifier                   | 0.0937                   | 0.1005 | 0.1895 | 0.3805 | 0.2581 | 0.2829 |
| <i>BRCA2</i> | rs2126042  | Intronic           | C > T                | Modifier                   | 0.1                      | -      | -      | -      | -      | -      |
| <i>BRCA2</i> | rs206075   | CDS                | A > G                | Low                        | 1                        | 0.9264 | 0.9967 | 0.9999 | 0.9995 | 0.9999 |
| <i>BRCA2</i> | rs1801406  | CDS                | A > G                | Low                        | 0.1031                   | 0.2292 | 0.2087 | 0.3848 | 0.3064 | 0.2924 |
| <i>BRCA2</i> | rs11571651 | Intronic           | G > T                | Modifier                   | 0                        | 0.0238 | 0.0633 | 0.0994 | 0.0335 | 0.1157 |
| <i>BRCA2</i> | rs9534262  | Intronic           | T > C                | Modifier                   | 0                        | 0.5729 | 0.51   | 0.5544 | 0.5137 | 0.4878 |
| <i>BRCA2</i> | rs1801499  | CDS                | T > C                | Low                        | 0.1406                   | 0.0238 | 0.067  | 0.1002 | 0.0348 | 0.115  |
| <i>BRCA2</i> | rs1799944  | CDS                | A > G                | Moderate                   | 0.1406                   | 0.0427 | 0.0672 | 0.1002 | 0.035  | 0.1151 |
| <i>BRCA2</i> | rs4987117  | CDS                | C > T                | Moderate                   | 0.1                      | 0.0053 | 0.0079 | 0.0001 | 0.0272 | 0.0079 |
| <i>BRCA2</i> | rs169547   | CDS                | T > C                | Moderate                   | 1                        | 0.933  | 0.997  | 0.9999 | 0.9996 | 0.9998 |
| <i>BRCA2</i> | rs11571642 | CDS                | T > C                | Low                        | 0.0833                   | 0.022  | 0.0022 | -      | 0.0003 | -      |
| <i>BRCA2</i> | rs11571707 | CDS                | T > C                | Moderate                   | 0.3203                   | 0.0026 | 0.1409 | 0.0036 | 0.0003 | 0.0018 |
| <i>BRCA2</i> | rs1801439  | CDS                | A > G                | Low                        | 0.1406                   | 0.0236 | 0.0667 | 0.1003 | 0.0349 | 0.1156 |
| <i>BRCA2</i> | rs27617481 | Intronic           | CT > C               | Modifier                   | 0                        | -      | -      | -      | -      | -      |
| <i>BRCA2</i> | rs766173   | CDS                | A > C                | Moderate                   | 0.1379                   | 0.024  | 0.0667 | 0.1002 | 0.035  | 0.1159 |

<sup>a</sup> NEXT\_PROT[modified-residue:phosphoserine]

**Table S2:** Pairwise FST among Amerindians (IND) and the five continental populations from the 1000 Genomes database.

|            | <b>IND</b> | <b>AFR</b> | <b>AMR</b> | <b>EAS</b> | <b>EUR</b> | <b>SAS</b> |
|------------|------------|------------|------------|------------|------------|------------|
| <b>IND</b> | —          |            |            |            |            |            |
| <b>AFR</b> | 0.17510    | —          |            |            |            |            |
| <b>AMR</b> | 0.00301    | 0.13472    | —          |            |            |            |
| <b>EAS</b> | 0.03669    | 0.17347    | 0.01746    | —          |            |            |
| <b>EUR</b> | 0.04446    | 0.15776    | 0.01112    | 0.02553    | —          |            |
| <b>SAS</b> | 0.01700    | 0.18424    | 0.03499    | 0.03956    | 0.03995    | —          |
